# Supplementary material for: Cytomolecular Classification of Thyroid Nodules Using Fine-Needle Washes Aspiration Biopsies
Source: MDPI journal article supplement (doi:10.3390/ijms23084156), 2022-04-09
Supplement: s1 [file s1]

## Article

# Cytomolecular Classification of Thyroid Nodules Using Fine-Needle Washes Aspiration Biopsies

## Supplementary Figures

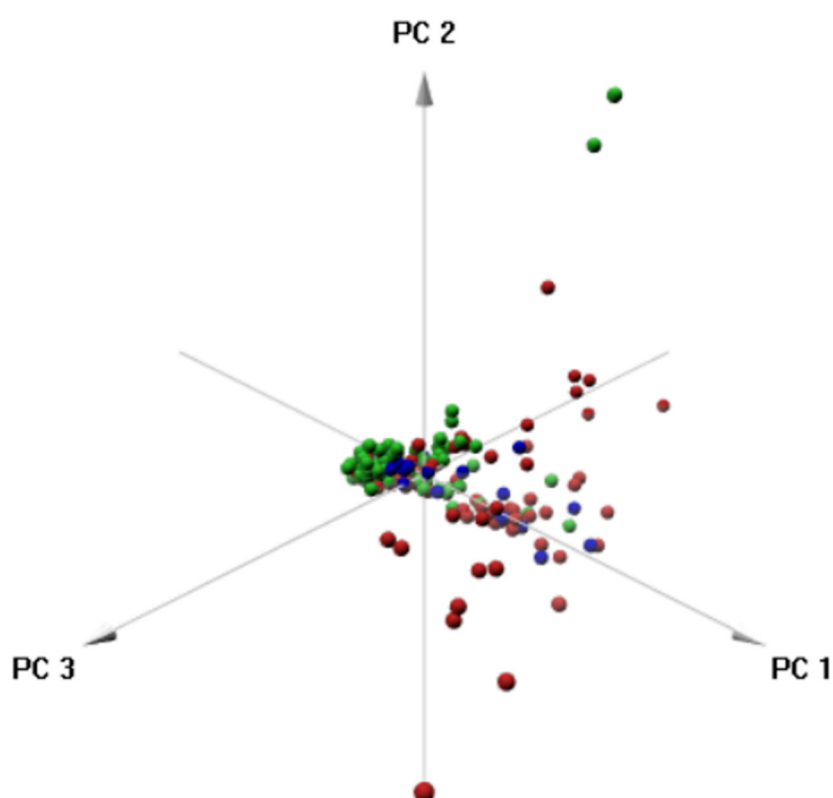

**Figure S1.** Principal component analysis on 240 thyroid FNA using the overall average spectrum of each sample. Green: benign entities (i.e. HP, HT, B-Goiter), Red: malignant nodules (i.e. PTC, MTC, rare parathyroid tumour), Blue: borderline diagnosis (i.e. NIFTP, FA, WDT-UMP) and Lymph node.

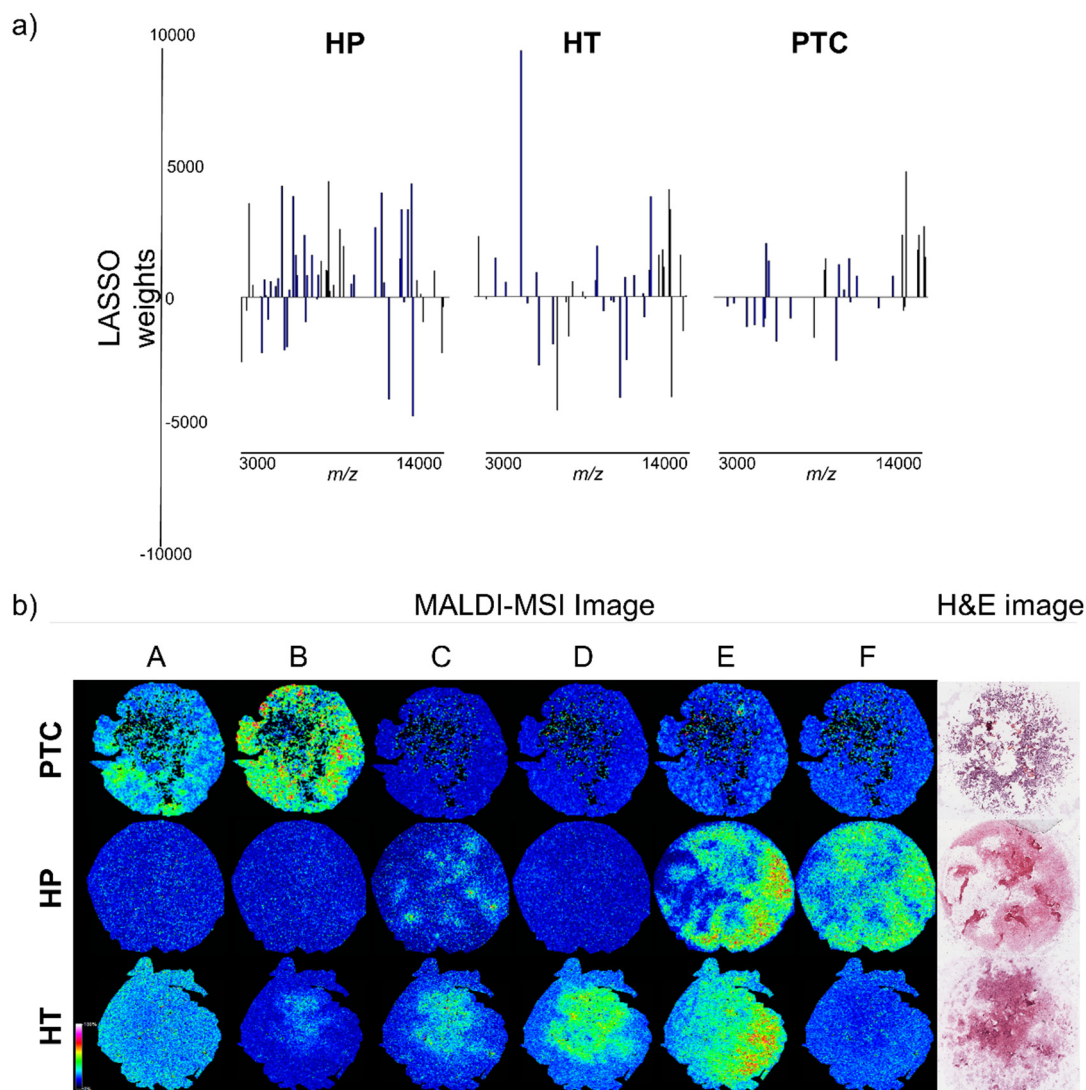

**Figure S2.** MALDI-MSI analysis of FNA needle washes and statistical analysis. **(a)** 95  $m/z$  features selected by the Lasso model with the corresponding weights in HP, HT and PTC samples. **(b)** HP, HT and PTC MALDI-MSI images of six  $m/z$  and their H&E images.

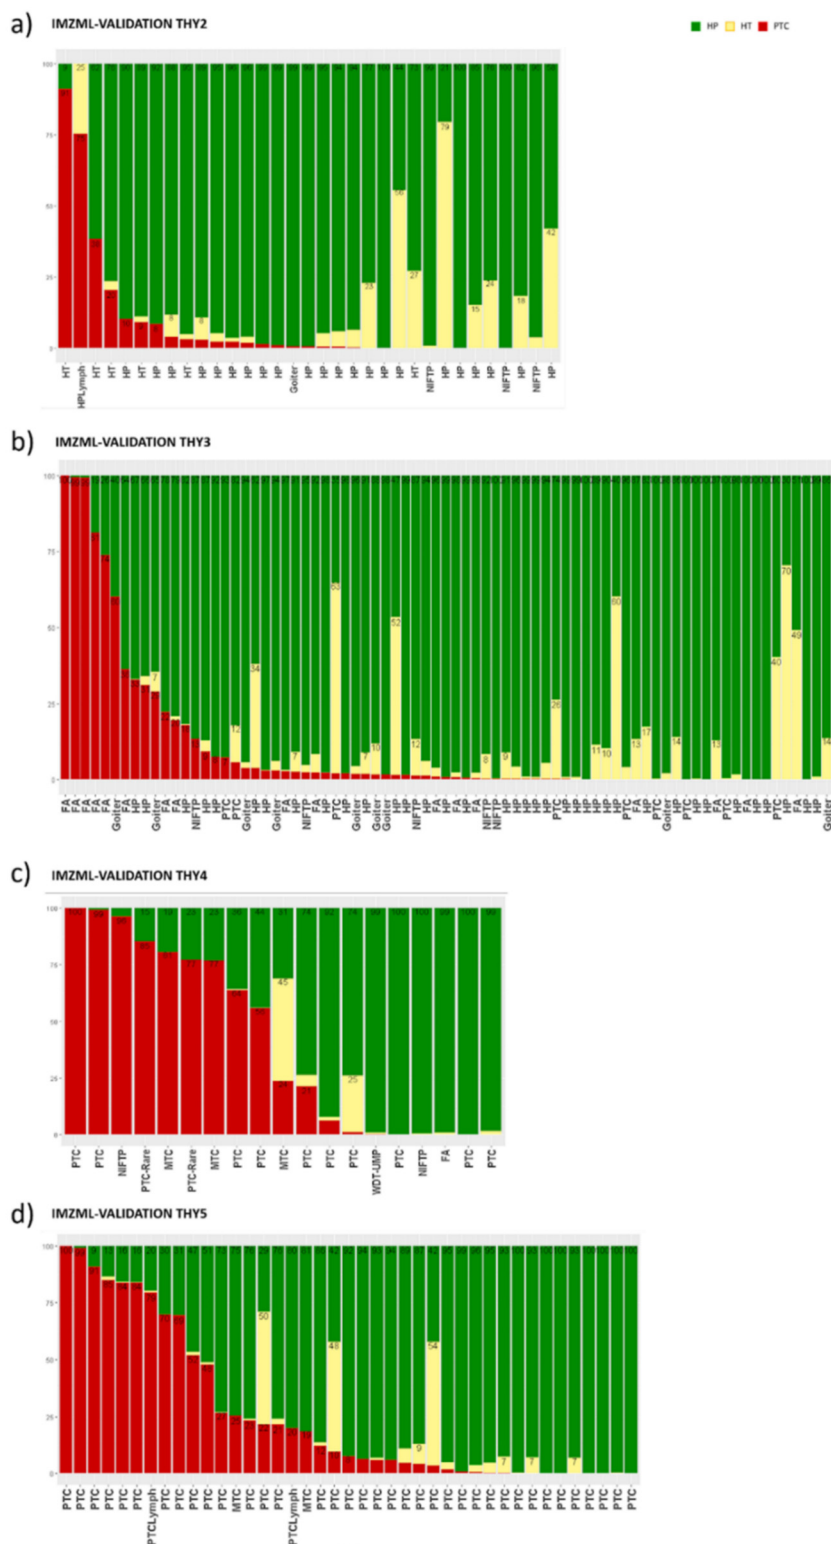

**Figure S3.** Stacked bar charts of the percentage of pixels in each FNA of the validation set classified based on pixel-by-pixel (IMZML) approach as HP (green), HT (yellow) and PTC (red) in the (a) 33 TIR2/THY2, (b) 77 TIR3/THY3, (c) 19 TIR4/THY4 and (d) 41 TIR5/THY5 samples. Each nodule was classified as malignant when the percentage of red pixels was > 7%.

## Supplementary Tables

Table S1. Cytological characteristics of thyroid nodules.

| Characteristic             | Total<br>(n=240) | THY2<br>(n=83) | Cytology       |                |                |
|----------------------------|------------------|----------------|----------------|----------------|----------------|
|                            |                  |                | THY3<br>(n=77) | THY4<br>(n=19) | THY5<br>(n=61) |
| <b>Diagnosis</b>           |                  |                |                |                |                |
| <b>Benign</b>              |                  |                |                |                |                |
| HP                         | 96               | 59             | 37             | 0              | 0              |
| HP-lymph                   | 1                | 1              | 0              | 0              | 0              |
| B-goiter                   | 13               | 4              | 9              | 0              | 0              |
| HT                         | 16               | 16             | 0              | 0              | 0              |
| FA                         | 18               | 0              | 17             | 1              | 0              |
| NIFTP                      | 10               | 3              | 5              | 2              | 0              |
| WDT-UMP                    | 1                | 0              | 0              | 1              | 0              |
| <b>Malignant</b>           |                  |                |                |                |                |
| PTC                        | 76               | 0              | 9              | 10             | 57             |
| PTC-lymph                  | 2                | 0              | 0              | 0              | 2              |
| MTC                        | 5                | 0              | 0              | 3              | 2              |
| Rare parathyroid<br>tumour | 2                | 0              | 0              | 2              | 0              |
| <b>Nodule Localization</b> |                  |                |                |                |                |
| Right Lobe                 | 122              | 45             | 40             | 12             | 25             |
| Left Lobe                  | 112              | 35             | 36             | 7              | 34             |
| Isthmus                    | 3                | 2              | 1              | 0              | 0              |
| Lymph node                 | 3                | 1              | 0              | 0              | 2              |
| <b>Nodule Size (mm)</b>    |                  |                |                |                |                |
| Mean (SD)                  | 20.7 (11.3)      | 21.3 (10.4)    | 23.7 (13.6)    | 16.1 (6.8)     | 17.6 (9.1)     |
| Range                      | 5-70             | 5-60           | 5-70           | 8-35           | 8-50           |
| <b>Sample cellularity*</b> |                  |                |                |                |                |
| Poor                       | 87               | 18             | 44             | 7              | 18             |
| Good                       | 94               | 40             | 24             | 7              | 23             |
| Optimal                    | 59               | 25             | 9              | 5              | 20             |

Legend: Goiter, HP-lymph node reported as HP; PTC-lymph and Rare parathyroid tumour, for the purpose of the analysis considered malignant as a PTC.

\*Sample cellularity: poor (sample with 20-30% of thyrocytes cells), good (sample with 30-70%) and optimal (sample with >70%).

HP: hyperplastic, HT: Hashimoto thyroiditis, FA: follicular adenoma, PTC: papillary thyroid carcinoma, MTC: medullary thyroid carcinoma, WDT-UMP: well differentiated tumor of uncertain malignant potential, NIFTP: Non-Invasive Follicular Thyroid neoplasm with Papillary-like nuclear features.

**Table S2.** Predicted diagnosis based on the 605 ROIs of the training set according to histopathology/follow-up.

| Histopathology/ follow-up | Prediction |        |    |           |
|---------------------------|------------|--------|----|-----------|
|                           | Total      | Benign | HT | Malignant |
| HP                        | 381        | HP     | 5  | PTC       |
| HT                        | 50         | 12     | 38 | 0         |
| PTC                       | 174        | 5      | 2  | 167       |

HP: hyperplastic, HT: Hashimoto thyroiditis, PTC: papillary thyroid carcinoma.

**Table S3.** Performances of the classifier on the three MALDI-MSI approaches in the training set (n=70).

|                 | TP | FP | TN | FN | % Sensitivity<br>(95%CI) | % Specificity<br>(95%CI) | % PPV<br>(95%CI) | % NPV<br>(95%CI) | AUC  | % Accuracy |
|-----------------|----|----|----|----|--------------------------|--------------------------|------------------|------------------|------|------------|
| Pixel-by-pixel  | 20 | 2  | 48 | 0  | 100.0 (83.2-100.0)       | 96.0 (86.3-99.5)         | 90.9 (70.8-98.9) | 100 (92.6-100)   | 1.00 | 97.1       |
| ROIs            | 20 | 0  | 50 | 0  | 100.0 (83.2-100.0)       | 100 (92.9-100)           | 100 (83.2-100)   | 100 (92.9-100)   | 1.00 | 100        |
| Average spectra | 19 | 0  | 50 | 1  | 95.0 (75.1-99.9)         | 100 (92.9-100)           | 100 (82.4-100)   | 98.0 (89.6-100)  | 0.98 | 98.6       |

Legend: TP=True Positive, FP=False Positive, TN=True Negative, FN=False Negative, PPV=Positive Predictive Value, NPV=Negative Predictive Value, 95%CI=95% Confidence Interval, AUC=Area Under the Curve

**Table S4.** Predicted diagnosis based on the 3 levels classification strategy in the pixel-by-pixel analysis according to histopathology/follow-up for a) the training set and b-e) the validation set by the Bethesda reporting system.

| a) Training (n=70) |       |        |           |           | Prediction |  |  |  |
|--------------------|-------|--------|-----------|-----------|------------|--|--|--|
| Histology/FUP      | Total | Benign | Gray Zone | Malignant |            |  |  |  |
| Benign             |       |        |           |           |            |  |  |  |
| HP                 | 40    | 35*    | 3         | 2         |            |  |  |  |
| HT                 | 10    | 10     | 0         | 0         |            |  |  |  |
| Malignant          |       |        |           |           |            |  |  |  |
| PTC                | 20    | 0      | 0         | 20        |            |  |  |  |

\*3 Goiter.

| b) TIR2 (n=33) |       |        |           |           | Prediction |  |  |  |
|----------------|-------|--------|-----------|-----------|------------|--|--|--|
| Histology/FUP  | Total | Benign | Gray Zone | Malignant |            |  |  |  |
| Benign         |       |        |           |           |            |  |  |  |
| HP             | 24    | 21*    | 2         | 1#        |            |  |  |  |
| HT             | 6     | 2      | 1         | 3         |            |  |  |  |
| FA             | 0     | 0      | 0         | 0         |            |  |  |  |
| NIFTP          | 3     | 3      | 0         | 0         |            |  |  |  |
| WDT-UMP        | 0     | 0      | 0         | 0         |            |  |  |  |

\*1 Goiter, #1 HP-lymph node.

| c) TIR3 (n=77)   |       | Prediction |           |           |
|------------------|-------|------------|-----------|-----------|
| Histology/FUP    | Total | Benign     | Gray Zone | Malignant |
| <b>Benign</b>    |       |            |           |           |
| HP               | 46    | 39*        | 2         | 5#        |
| HT               | 0     | 0          | 0         | 0         |
| FA               | 17    | 9          | 0         | 8         |
| NIFTP            | 5     | 4          | 1         | 0         |
| WDT-UMP          | 0     | 0          | 0         | 0         |
| <b>Malignant</b> |       |            |           |           |
| PTC              | 9     | 8          | 1         | 0         |
| MTC              | 0     | 0          | 0         | 0         |

\*7 Goiter, #2 Goiter.

| d) TIR4 (n=19)   |       | Prediction |           |           |
|------------------|-------|------------|-----------|-----------|
| Histology/FUP    | Total | Benign     | Gray Zone | Malignant |
| <b>Benign</b>    |       |            |           |           |
| HP               | 0     | 0          | 0         | 0         |
| HT               | 0     | 0          | 0         | 0         |
| FA               | 1     | 1          | 0         | 0         |
| NIFTP            | 2     | 1          | 0         | 1         |
| WDT-UMP          | 1     | 1          | 0         | 0         |
| <b>Malignant</b> |       |            |           |           |
| PTC              | 12    | 5          | 0         | 7°        |
| MTC              | 3     | 0          | 0         | 3         |

°2 rare parathyroid tumour.

| e) TIR5 (n=41)   |       | Prediction |           |           |
|------------------|-------|------------|-----------|-----------|
| Histology/FUP    | Total | Benign     | Gray Zone | Malignant |
| <b>Malignant</b> |       |            |           |           |
| PTC              | 39    | 20         | 3         | 16#       |
| MTC              | 2     | 0          | 0         | 2         |

#2 PTC-lymph node.

HP: hyperplastic, HT: Hashimoto thyroiditis, FA: follicular adenoma, PTC: papillary thyroid carcinoma, MTC: medullary thyroid carcinoma, WDT-UMP: well differentiated tumor of uncertain malignant potential, NIFTP: Non-Invasive Follicular Thyroid neoplasm with Papillary-like nuclear features.
